# Supplementary material for: Effects of exercise intervention on executive function in children with overweight and obesity: a systematic review and meta-analysis
Source: PeerJ. 2025 Apr 14;13:e19273. doi: 10.7717/peerj.19273 (PMC12005193; doi:10.7717/peerj.19273)
Supplement: Supplemental Information 3 [file peerj-13-19273-s003.xlsx]

## Sheet: Sheet1
ID	author	year	nationality	CG size	EG1 size	EG2 size	Number of people lost in the CG	Number of people lost in the EG1	Number of people lost in the EG2	CG age Mean	CG age SD	EG1 age Mean	EG1 age SD	EG2 age Mean	EG2 age SD	CG base line BMI Mean	CG base line BMI SD	EG1 base line BMI Mean	EG1 base line BMI SD	EG2 base line BMI Mean	EG2 base line BMI SD	EG Intervention	EG1 Exercise intensity	EG2 Exercise intensity	EG1 Exercise duration/frequency/period	EG2 Exercise duration/frequency/period	CG Intervention	test tool
1	Zhang	2020	China	19	19		not	not		14.65	0.49	14.6	0.5			27.75	2.56	28.06	3.91			Jump rope	Moderate intensity (heart rate: 140 beats /min-150 beats /min)		30min* once		read	Stroop test、 food-cue related Stroop test
2	Krafft	2014	USA	25	25		6	1		9.9	0.9	9.7	0.8			not	not	not	not			Games of tag and jumping rope are aerobic exercises	Average heart rate: 161 beats /min		40min/ time *5 times/week *8 months		sedentariness	Flanker test
3	Chou	2023	China	33	37	38	8	12	13	11.32	0.54	11	0.64	11.37	0.58	20.83	0.86	20.77	0.55	20.69	0.62	Competitive team games Running, jumping rope, modified baseball, modified football, modified basketball	Heart rate > 150 beats /min	Heart rate > 150 beats /min	40min/ time *5 times/week *10 weeks	20min/ time *5 times/week *10 weeks	sedentariness	Stroop test
4	Xiang	2019	China	22	22		4	4		13.28	0.83	12.5	1.92			29.09	2.66	29.57	4.25			Aerobic training, ball games, outdoor training, yoga, resistance training + dietary intervention	Aerobic training (60-75% HRmax or 70-90% HRmax), ball games (60-75% HRmax), outdoor training (40-75% HRmax), yoga (50-75% HRmax) and resistance training (40-50% maximal strength)		300min/ day *6 days/week *6 weeks		No physical activity	Stroop test
5	Chen	2016	China	29	31		4	6		12.84	0.75	12.64	0.7			12.84	0.75	12.64	0.7			Brisk walking, climbing stairs, jumping rope, dancing and other aerobic exercises	Medium strength (60%-70% HRmax)		40min/ time *4 times/week *3 months		Health education curriculum	WCST
6	Zhang	2022	China	24	24	24	not	not	not	11.38	0.77	11.58	1.14	11.71	1.16	25.88	0.73	25.88	1.12	26.31	1.21	High intensity intermittent treadmill exercise/High intensity continuous jump rope exercise	85–95% HRmax	80–85% HRmax	30min* once	30min* once	watch a cartoon	Stroop test
7	Davis	2007	USA	29	32	33	not	not	not	9.2	0.84	9.2	0.84	9.2	0.84	25.8	4	25.8	4	25.8	4	Running games, jump rope and improved basketball and soccer	HR>150 times /min	HR>150 times /min	40min/ time *5 times/week *15 weeks	20min/ time *5 times/week *15 weeks	daily activities	CAS
8	Davis	2011	USA	60	56	55	not	not	not	9.3	1	9.3	1	9.3	1	26	4.6	26	4.6	26	4.6	Running games, jump rope, improved basketball and soccer	HR>150 times /min	HR>150 times /min	40min/ time *5 times/week *13 weeks	20min/ time *5 times/week *13 weeks	No physical activity	CAS
9	Gallotta	2015	Italy	11	19	23	not	not	not	8~11						27.4	3.1	25.1	2	25.1	2	Coordination training such as sports games and rhythmic activities/traditional training such as strength, endurance and fitness	5<RPE<8	5<RPE<8	60min/ time *2 times/week /5 months	60min/ time *2 times/week /5 months	No physical activity	d2-R test
10	Liu	2018	China	35	35		not	not		14.17	0.71	13.94	0.94			27.92	3.29	28.01	3.03			Jump rope	Heart rate: 150 beats /min-170 beats /min		75min/ time *2 times/week *12 weeks		await	Stroop task、food-cue related Stroop test
ID	author	year	nationality	CG size	EG1 size	EG2 size	EG3 size	Number of people lost in the CG	Number of people lost in the EG1	Number of people lost in the EG2	Number of people lost in the EG3	CG age Mean	CG age SD	EG1 age Mean	EG1 age SD	EG2 age Mean	EG2 age SD	EG3 age Mean	EG3 age SD	CG base line BMI Mean	CG base line BMI SD	EG1 base line BMI Mean	EG1 base line BMI SD	EG2 base line BMI Mean	EG2 base line BMI SD	EG3 base line BMI Mean	EG3 base line BMI SD	EG Intervention	EG1 Exercise intensity	EG2 Exercise intensity	EG3 Exercise intensity	EG1 Exercise duration/frequency/period	EG2 Exercise duration/frequency/period	EG3 Exercise duration/frequency/period	CG Intervention	test tool
11	Xie	2023	China	20	20	20	20	not	not	not	not	9.9	0.72	9.75	0.64	9.75	0.64	9.65	0.67	21.55	1.9	21.62	1.8	22.02	2.92	21.29	1.62	Basketball + jump rope	HR: 130-150 cycles /min	HR: 130-150 cycles /min	HR: 130-150 cycles /min	40min* once	30min* once	20min* once	Classroom study	Flanker、N-Back、More-odd shifting
12	Zhu	2022	China	20	20			not	not	not	not	10.55	0.76	10.75	0.85					24.97	2.26	24.37	2.11					Basketball + jump rope	Average heart rate: 135 beats /min			40min* once			Regular sports club activities	Flanker、1-Back、More-odd shifting
ID	author	year	nationality	CG1 size	CG2 size	EG1 size	EG2 size	Number of people lost in the CG1	Number of people lost in the CG2	Number of people lost in the EG1	Number of people lost in the EG2	CG1 age Mean	CG1 age SD	CG2 age Mean	CG2 age SD	EG1 age Mean	EG1 age SD	EG2 age Mean	EG2 age SD	CG1 base line BMI Mean	CG1 base line BMI SD	CG2 base line BMI Mean	CG2 base line BMI SD	EG1 base line BMI Mean	EG1 base line BMI SD	EG2 base line BMI Mean	EG2 base line BMI SD	EG Intervention	EG1 Exercise intensity	EG2 Exercise intensity		EG1 Exercise duration/frequency/period	EG2 Exercise duration/frequency/period		CG Intervention	test tool
13	Zhang	2019	China	20	20	20	20	not	not	not	not	10.5	0.51	10.3	0.73	10.4	0.5	10.2	0.69	21.43	0.88	21.44	0.93	21.51	1.02	21.31	0.85	Basketball + jump rope	HR: 130-150 cycles /min	HR: 130-150 cycles /min		40min* once	20min* once		self-study	Flanker、N-Back、More-odd shifting
